# Supplementary material for: Suppression of Banana Fusarium Wilt Disease With Soil Microbial Mechanisms Via Pineapple Rotation and Residue Amendment
Source: Research Square preprint supplement (doi:10.21203/rs.3.rs-1015644/v1), 2021-11-03
Supplement: Supplementary file 2 [file daa20918bc50eab20e38650f.docx]

**Graphic for manuscript**

**Title:** **Suppression of** **banana *Fusarium* wilt disease with soil microbial mechanisms via pineapple rotation and residue amendment**

1. In order to banana healthy plant (III), Two systems (banana-pineapple crop rotation and residue amendment (II)) were planted/added into a banana orchard soil with high incidence of Fusarium wilt of banana (I).
2. The soil samples were assessed for physical and chemical properties, culturable microorganisms and high-throughput sequence.

3. We recruited the beneficial microorganisms *Burkholderia* and *Talaromyces* in crop rotation, and *Aspergillus* in residue amendment have significant negative relationship to disease incidence, which plays a key role in Fusarium reduction.

**
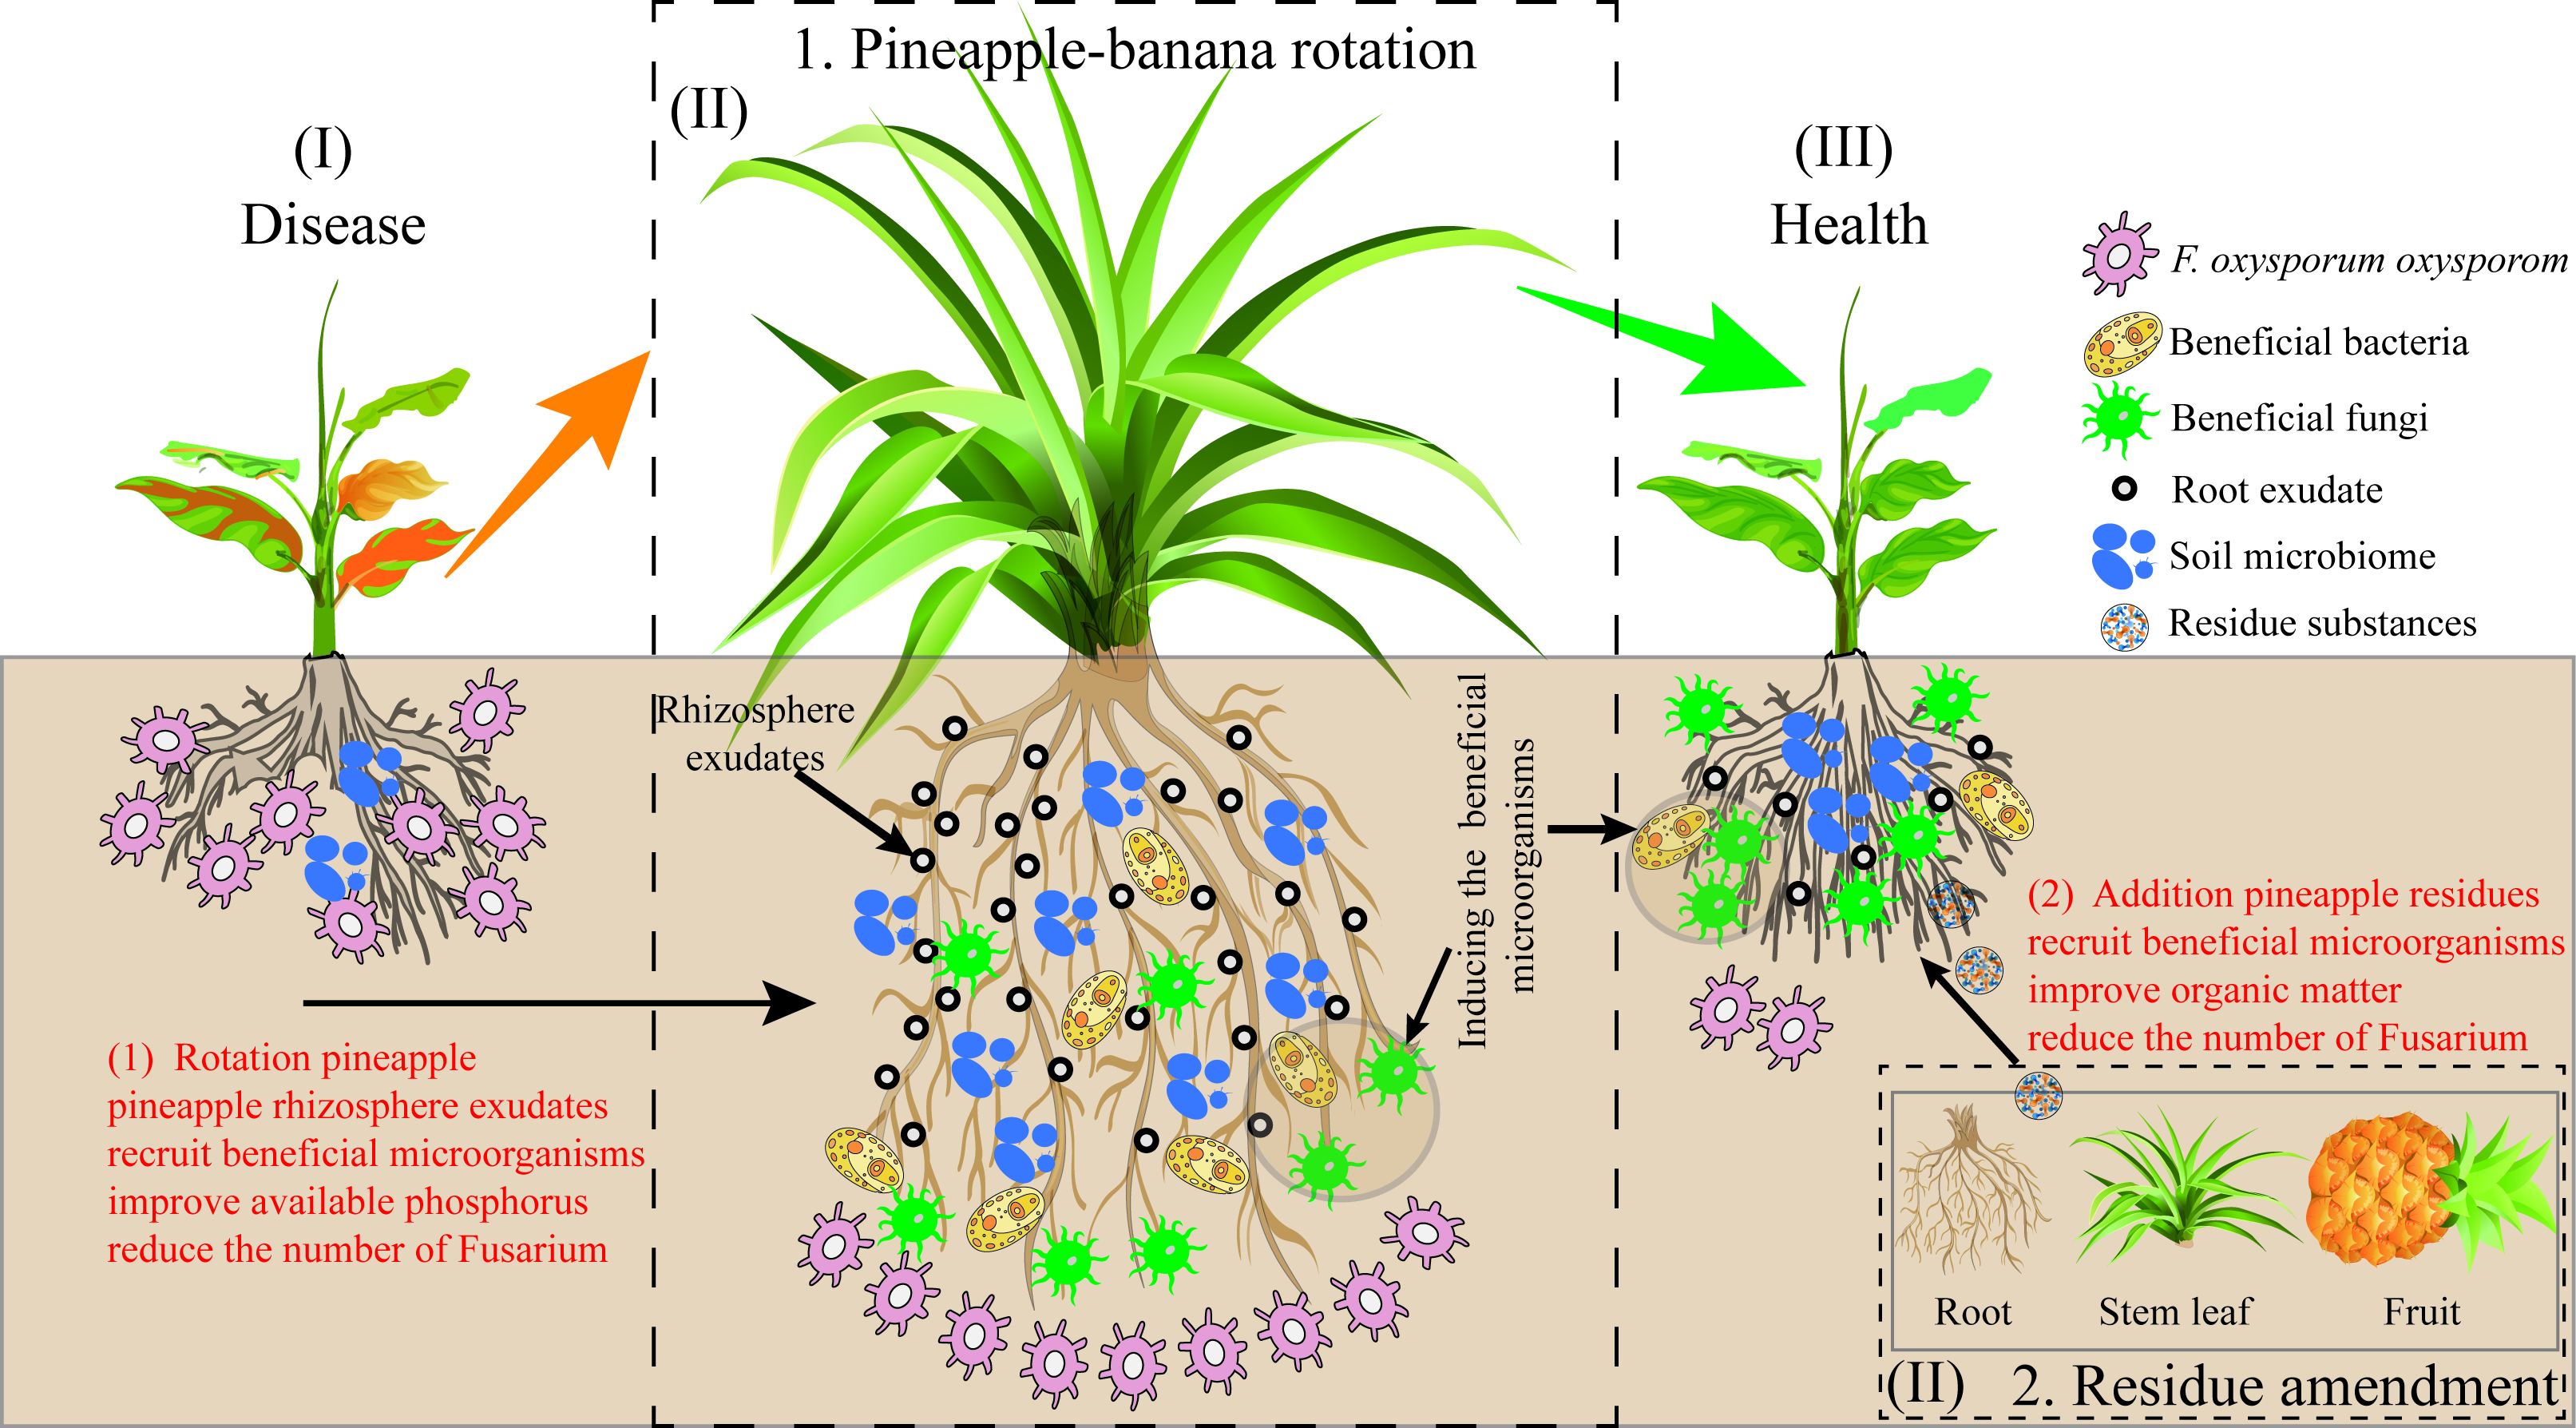
**
